# Supplementary material
Source: publisher site journal article supplement (https://www.spandidos-publications.com/6339/downloadSupplementary)
Supplement: Supplementary file [file downloadSupplementary]

**Table SI.** Changes in the proportion of mobile phase.

| Time (min) | Water (%) | Methanol (%) |
|------------|-----------|--------------|
| 0.00       | 67        | 33           |
| 0.00       | 67        | 33           |
| 3.00       | 67        | 33           |
| 3.50       | 50        | 50           |
| 7.50       | 50        | 50           |
| 8.00       | 20        | 80           |
| 13.00      | 20        | 80           |
| 13.50      | 67        | 33           |

The column was an Agilent ZORBAX SB-C18 (3.0 x 100 mm, 1.8-Micron). The mobile phase comprised methanol and water with a flow rate of 0.3 ml/min. Puerarin, daidzin and daidzein were detected at a UV wavelength of 250, 270 and 260 nm, respectively. Testosterone (240 nm) acted as the internal standard. The retention times of puerarin, daidzin and daidzein were 3.82, 5.19 and 9.55 min, respectively.

**Table SII.** Primer sequences for quantitative PCR.

| Gene name                         | Primer sequence (5'-3')    |
|-----------------------------------|----------------------------|
| <i>Col1a1</i>                     | F: CGGAGAAGAAGGAAAACGAGGAG |
|                                   | R: CACCATCAGCACCAGGGAAAC   |
| <i>Col3a1</i>                     | F: GCACAGCAGTCCAACGTAGA    |
|                                   | R: TCTCCAAATGGGATCTCTGG    |
| <i>TIMP-1</i>                     | F: GCAACTCGGACCTGGTCATAA   |
|                                   | R: CGGCCCGTGATGAGAAACT     |
| <i>Fibronectin</i>                | F: GTGGCTGCCTTCAACTTCTC    |
|                                   | R: TGAATGCCAGTCCTTTAGGG    |
| <i>Kim-1</i>                      | F: ACATATCGTGGAATCACAACGAC |
|                                   | R: ACTGCTCTTCTGATAGGTGACA  |
| <i>Ngal</i>                       | F: GCAGGTGGTACGTTGTGGG     |
|                                   | R: CTCTTGTAGCTCATAGATGGTGC |
| <i>IL-6</i>                       | F: GAGCCCACCAAGAACGATAG    |
|                                   | R: TCCACGATTTCCCAGAGAAC    |
| <i>TNF-<math>\alpha</math></i>    | F: AGGGTCTGGGCCATAGAACT    |
|                                   | R: CCACCACGCTCTTCTGTCTAC   |
| <i>CCL2</i>                       | F: TTAAAAACCTGGATCGGAACCAA |
|                                   | R: GCATTAGCTTCAGATTTACGGGT |
| <i>CCL3</i>                       | F: CAGCCAGGTGTCATTTTCCT    |
|                                   | R: CTCAAGCCCCTGCTCTACAC    |
| <i>Wnt1</i>                       | F: TCAGAACCGCAGCACAGAAC    |
|                                   | R: TTCACGATGCCCCACCATC     |
| <i>Wnt3</i>                       | F: GGGGCGTATTCAAGTAGCTG    |
|                                   | R: GTAGGGACCTCCCATTGGAT    |
| <i>Wnt4</i>                       | F: CGAGCAATTGGCTGTACCTGG   |
|                                   | R: CAGGCCTTTGAGTTTCTCG     |
| <i><math>\beta</math>-catenin</i> | F: GTGCAATTCCTGAGCTGACA    |
|                                   | R: CTTAAAGATGGCCAGCAAGC    |
| <i>IL-10</i>                      | F: TGCTATGCTGCCTGCTCTTA    |
|                                   | R: TCATTTCCGATAAAGGCTTGG   |
| <i>CXCL1</i>                      | F: GCTGGGATTCACCTCAAGAA    |
|                                   | R: AGGTGCCATCAGAGCAGTCT    |
| <i>Claudin-1</i>                  | F: GCCATCTACGAGGGACTGTG    |
|                                   | R: CCCCAGCAGGATGCCAATTA    |
| <i>Claudin-7</i>                  | F: TGTACAAGGGGCTCTGGATG    |
|                                   | R: GGACACCACCATTAAGGCTC    |
| <i>Occludin</i>                   | F: ACTCCTCCAATGGCAAAGTG    |
|                                   | R: CCCACCTGTCGTGTAGTCT     |
| <i>Tjp-1</i>                      | F: AGAGACAAGATGTCCGCCAG    |
|                                   | R: TGCAATTCCAAATCCAAACC    |
| <i>Tjp-2</i>                      | F: GTGATTTTCTTCAACCCGGA    |
|                                   | R: TTTTGGAGCTTGTTGGCTTG    |
| <i>IL-1<math>\beta</math></i>     | F: CAGGCAGGCAGTATCACTCA    |
|                                   | R: AGCTCATATGGGTCCGACAG    |
| <i>CXCL2</i>                      | F: TCCAGAGCTTGAGTGTGACG    |
|                                   | R: CTTTGGTTCTTCCGTTGAGG    |
| <i>F4/80</i>                      | F: TCTGGGGAGCTTACGATGGA    |
|                                   | R: GAATCCCAGCAATGATGGCAC   |
| <i>GAPDH</i>                      | F: AGGTCGGTGTGAACGGATTTG   |
|                                   | R: TGTAGACCATGTAGTTGAGGTCA |

F, forward; R, reverse.
